# Supplementary material for: Molecular envelope and atomic model of an anti-terminated glyQS T-box regulator in complex with tRNAGly
Source: PubMed Central journal article supplement — Nucleic Acids Res. 2017 May 22;45(13):8079–90. doi: 10.1093/nar/gkx451 (PMC5570125; doi:10.1093/nar/gkx451), 2017-05-22
Supplement: gkx451_supp.pdf [file gkx451_supp.pdf]

## Supplementary Information

### **Molecular envelope and atomic model of an anti-terminated *glyQS* T-box regulator in complex with tRNA<sup>Gly</sup>**

Bhaskar Chetnani<sup>1</sup>, and Alfonso Mondragón<sup>1</sup>

<sup>1</sup>Department of Molecular Biosciences, Northwestern University, 2205 Tech Drive, Evanston, IL, 60208, USA;

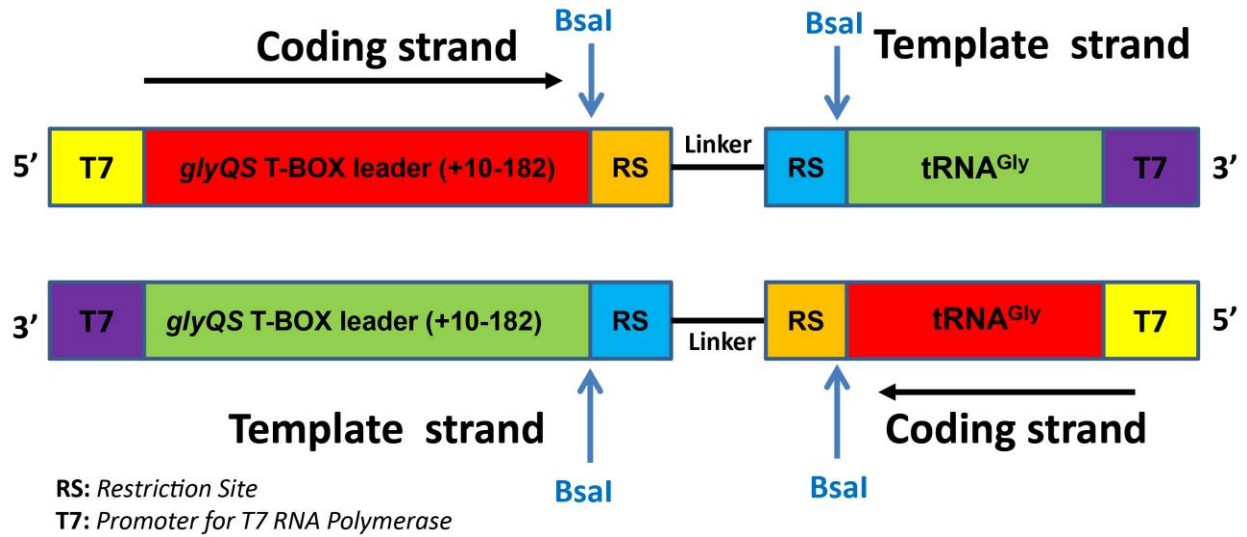

**Supplementary Figure 1. Schematic diagram showing the design of the bicistronic DNA construct for *in vitro* transcription of the *B. subtilis* glyQS T-box leader and its cognate tRNA<sup>Gly</sup>. RS corresponds to enzyme restriction sites used to linearize the circular plasmid, T7 to the T7 RNA polymerase promoter sequence. Sequences for the two RNAs are shown in Figure 1.**

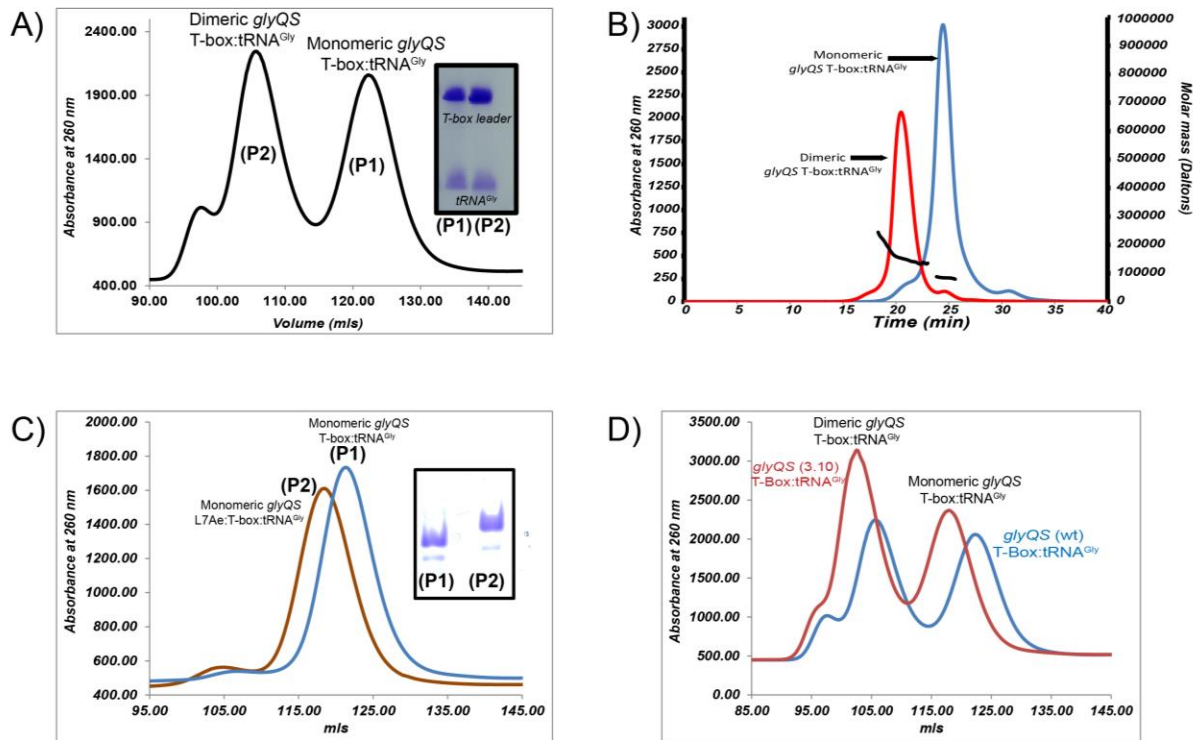

**Supplementary Figure 2. Purification of the *B. subtilis* glyQST-box:tRNA<sup>Gly</sup> complexes for structural studies by SAXS.** **A)** Elution profile of the *in vitro* transcription reaction for the wild-type *B. subtilis* glyQST T-box:tRNA<sup>Gly</sup> complex. The horizontal and vertical axes correspond to elution volume (ml) and absorbance at 260 nm (arbitrary units), respectively. The RNA content of the two main peaks (P1 and P2) was tested on an 8M urea gel (inset). **B)** The molecular weight and homogeneity of the T-box:tRNA complex in P1 and P2 was determined by SEC-MALS, which shows that P1 and P2 corresponds to monomeric (1:1) and dimeric (2:2) complexes, respectively. The horizontal and vertical axes correspond to the elution time (min), absorbance at 260nm (arbitrary units), and molar mass (daltons), respectively. **C)** SEC analysis showing that the monomeric *B. subtilis* glyQST T-box:tRNA<sup>Gly</sup> complex forms a stable ternary complex with the K-turn binding L7Ae protein. The inset shows a gel shift assay stained for RNA showing complex formation. The horizontal and vertical axes correspond to elution volume (ml) and absorbance at 260 nm (arbitrary units). **D)** Elution profiles of the *in vitro* transcription reaction for the *B. subtilis* glyQST (S3.10) T-box:tRNA<sup>Gly</sup> and the wild-type *B. subtilis* glyQST T-box:tRNA<sup>Gly</sup> complexes. The horizontal and vertical axes correspond to elution volume (ml) and absorbance at 260 nm (arbitrary units) respectively.

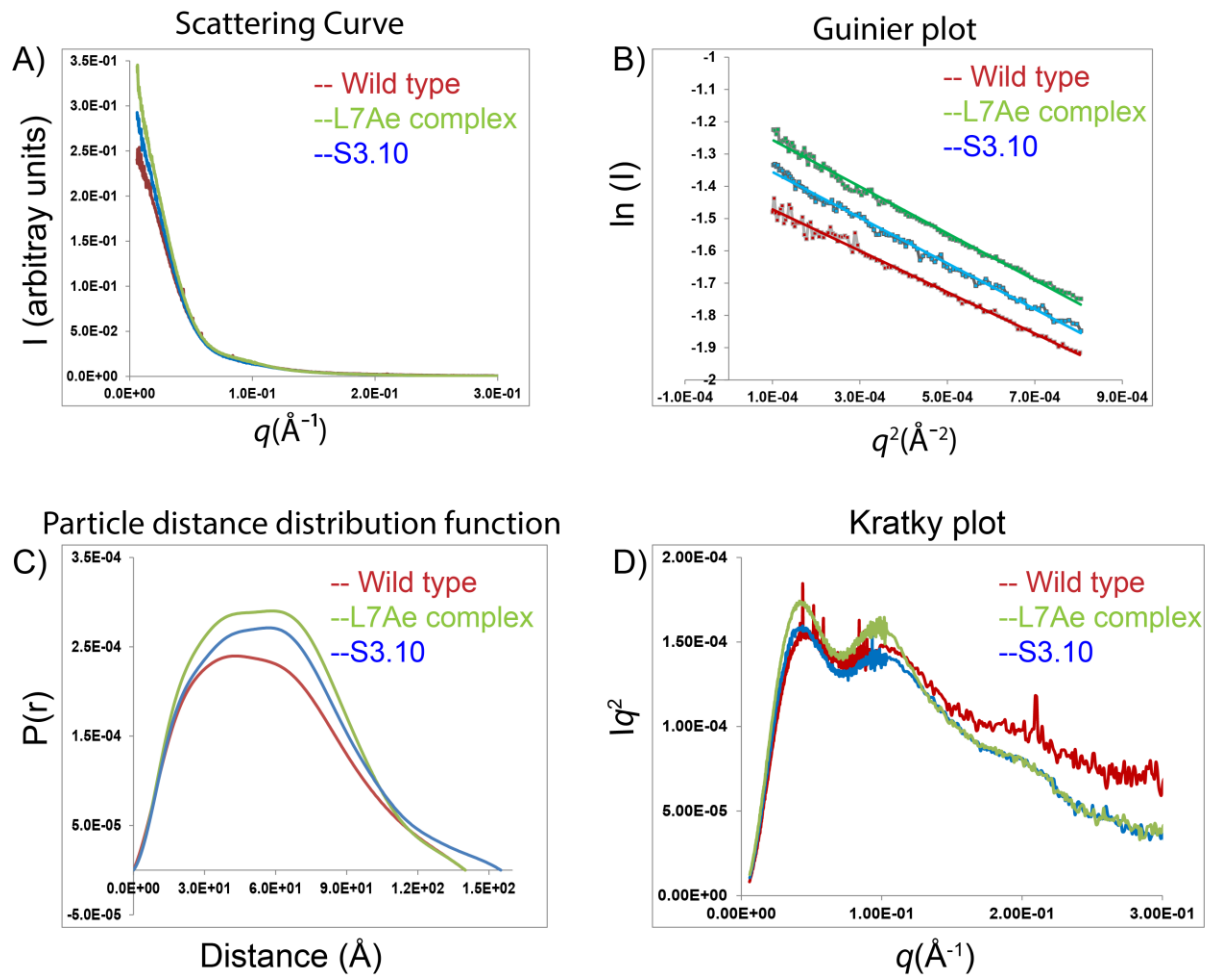

**Supplementary Figure 3. Small-angle X-ray scattering data of the different monomeric *B. subtilis* glyQS T-box:tRNA<sup>Gly</sup> complexes analyzed.** **A)** Experimental SAXS curves. The horizontal and vertical axes correspond to  $q$  ( $\text{\AA}^{-1}$ ), the momentum transfer, and the scattering intensity ( $I$ ) (arbitrary units). **B)** Guinier plots. The horizontal and vertical axis correspond to  $q^2$  ( $\text{\AA}^{-1}$ )<sup>2</sup> and the logarithm of the scattering intensity, respectively. **C)** Pairwise distribution functions  $P(r)$  calculated from the final data sets. The horizontal and vertical axes correspond to the Distance ( $\text{\AA}$ ) and the calculated  $P(r)$ . **D)** Kratky plot calculated from the final data sets. The horizontal and vertical axis correspond to  $q$  ( $\text{\AA}^{-1}$ ) and  $Iq^2$  respectively.

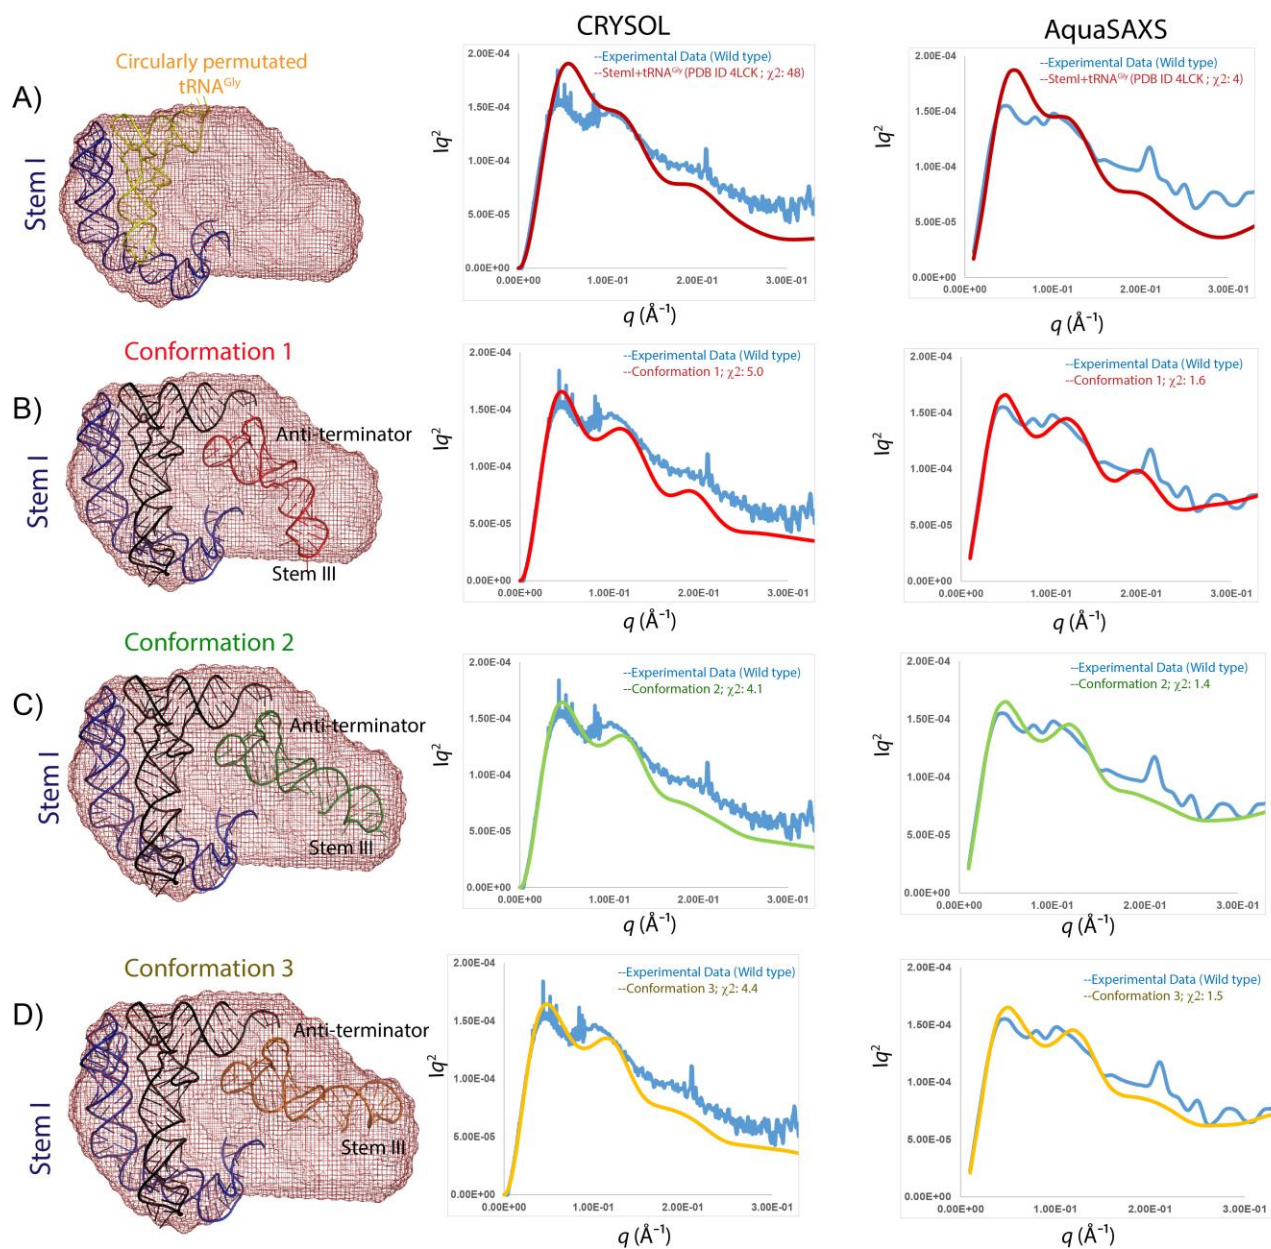

**Supplementary Figure 4. Comparison of theoretical scattering profile computed from different structural models with the experimental scattering profile for wild type *glyQS* T-box:tRNA<sup>Gly</sup> complex.** The left panels in **A)** to **D)** show the location of various structural models in the SAXS derived molecular envelope of the wild type *glyQS* T-box:tRNA<sup>Gly</sup> complex. The middle and right panels depict Kratky plots computed from the theoretical and experimental scattering curves in which the horizontal and vertical axis correspond to  $q$  ( $\text{\AA}^{-1}$ ) and  $lg^2$  respectively. The middle panels in **A)** to **D)** show the fit of experimental and theoretical scattering profile computed using CRYSOLOG (1). The right panels show the fitting of the same experimental and theoretical scattering profile computed using AquaSAXS (2). Note that the two programs use different algorithms for modelling the primary hydration shells and, overall, AquaSAXS produces a better fit of the theoretical data to the experimental data. **A)** shows the fit of the

crystal structure of Stem I in complex with a circularly permuted tRNA<sup>Gly</sup> (**PDB ID: 4LCK**) (3). **B)-D)** shows the fit of three representative conformers with different relative orientation (Conformation 1 to 3) of Stem III with respect to the anti-terminator helix.

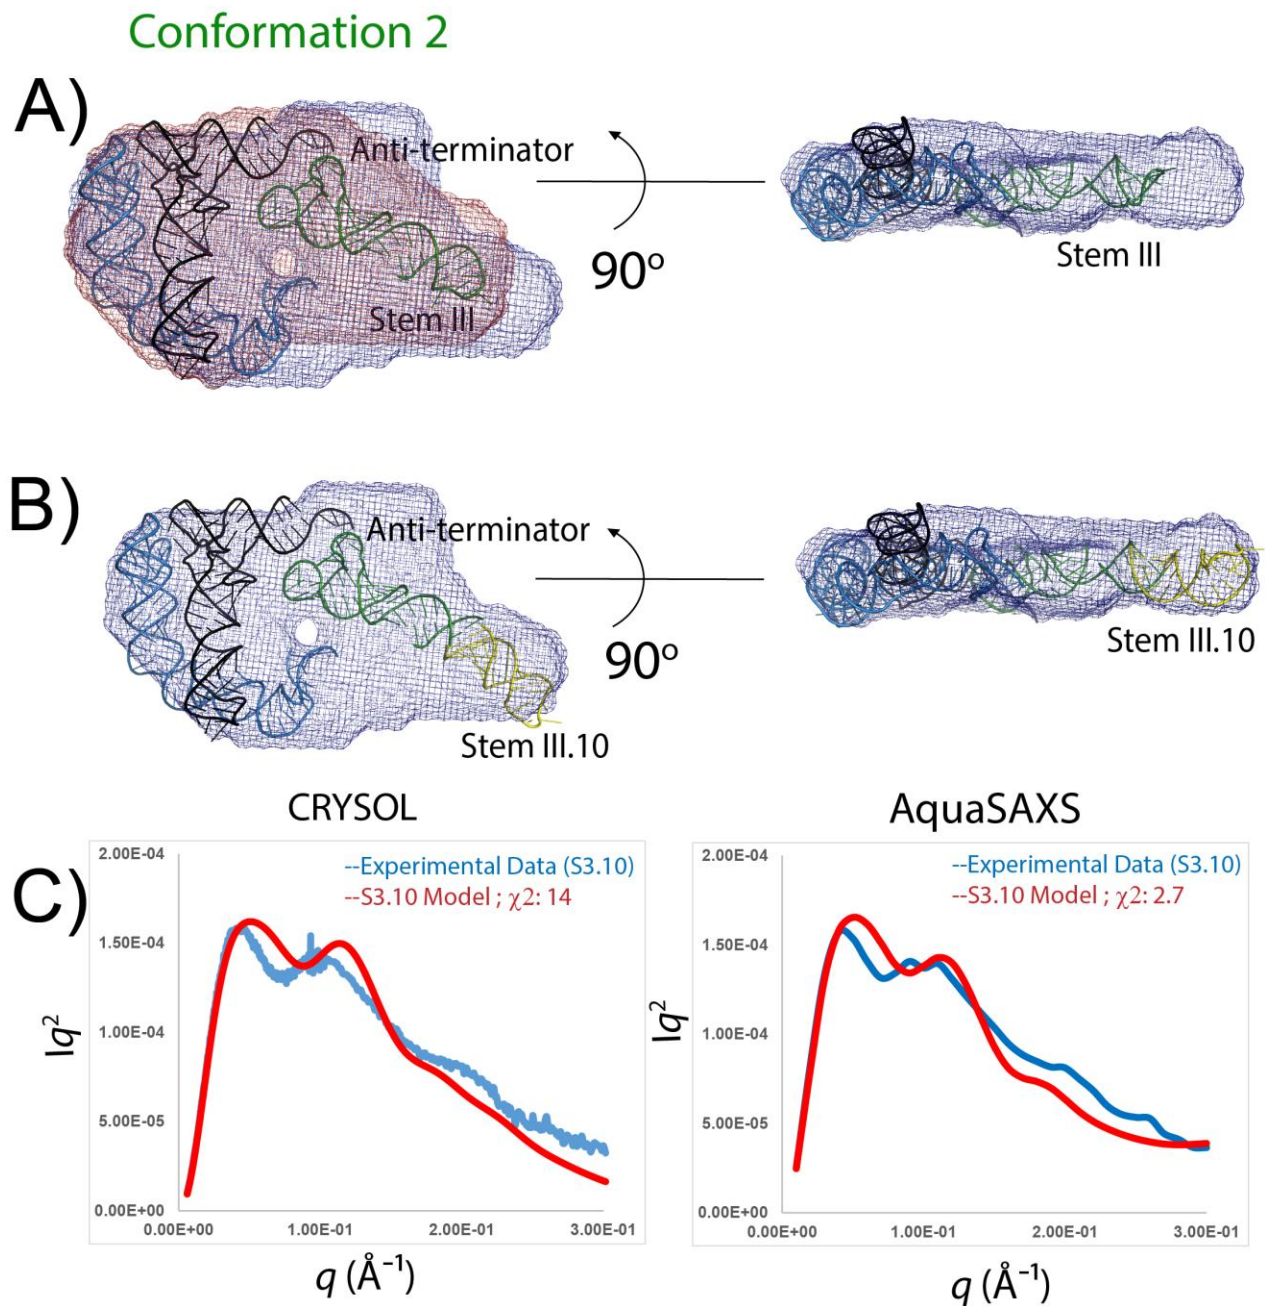

**Supplementary Figure 5. Location of the anti-terminator helix and the elongated Stem III in the molecular envelope of the *glyQS* (S3.10): tRNA<sup>Gly</sup> complex.** The left panel in **A**) depicts the superposition of the molecular envelopes of wild type *glyQS*:tRNA<sup>Gly</sup> complex (red) onto the *glyQS* (S3.10): tRNA<sup>Gly</sup> complex (blue) and the structural model which fits best to the wild type experimental data as a cartoon. **B**). The conformation of Stem III that fits best to the wild type experimental data was extended by adding 10 additional base pairs (yellow). In **B**), orthogonal views of the molecular envelope are shown, which support the position and orientation of the elongated Stem III helix. **C**) Fit of the theoretical scattering profile computed from the model *glyQS* (S3.10): tRNA<sup>Gly</sup> complex to the experimental profile. The left panel in **C**) was computed using CRY SOL (1) and right panel was computed using AquaSAXS (2). Note that the two programs use different algorithms for modelling the primary hydration shells and, overall, AquaSAXS

produces a better fit of the theoretical data to the experimental data. The theoretical and experimental scattering profile in **C**) are depicted as Kratky plots in which the horizontal and vertical axis correspond to  $q$  ( $\text{\AA}^{-1}$ ) and  $Iq^2$  respectively.



**Supplementary Table I.** SAXS data collection and processing parameters

|                                                     | <b>T-box (wt):tRNA<sup>Gly</sup></b> | <b>T-box (wt):tRNA<sup>Gly</sup>:L7Ae</b> | <b>T-box(S3.10):tRNA<sup>Gly</sup></b> |
|-----------------------------------------------------|--------------------------------------|-------------------------------------------|----------------------------------------|
| <b>Data-collection parameters</b>                   |                                      |                                           |                                        |
| Source                                              | ID5-D at DND CAT (APS)               | ID5-D at DND CAT (APS)                    | ID5-D at DND CAT (APS)                 |
| Instrument                                          | Rayonix SAXS/MAXS/WAXS<br>CCD        | Rayonix SAXS/MAXS/WAXS<br>CCD             | Rayonix SAXS/MAXS/WAXS<br>CCD          |
| Beam geometry                                       | 0.25 mmx 0.25 mm pin-hole            | 0.25 mmx 0.25 mm pin-hole                 | 0.25 mmx 0.25 mm pin-hole              |
| Energy (KeV)                                        | 10                                   | 10                                        | 10                                     |
| $q$ range ( $\text{\AA}^{-1}$ )                     | 0.0015-2.6                           | 0.0015-2.6                                | 0.0015-2.6                             |
| Total exposure time (sec)                           | 50                                   | 50                                        | 50                                     |
| Concentration range (mg/ml)                         | 0.2-0.74                             | 0.2-0.55                                  | 0.21-0.54                              |
| Temperature ( $^{\circ}$ K)                         | 293                                  | 293                                       | 293                                    |
| <b>Structural Parameters</b>                        |                                      |                                           |                                        |
| $I(0)$ ( $\text{cm}^{-1}$ ) [from $P(r)$ ]          | 0.24                                 | 0.29                                      | 0.27                                   |
| $R_g$ ( $\text{\AA}$ ) [from $P(r)$ ]               | 44.6                                 | 44.72                                     | 46.35                                  |
| $I(0)$ ( $\text{cm}^{-1}$ ) [from Guinier]          | 0.24 $\pm$ 0.00041                   | 0.30 $\pm$ 0.00069                        | 0.27 $\pm$ 0.00058                     |
| $R_g$ ( $\text{\AA}$ ) [from Guinier]               | 43.17 $\pm$ 1.29                     | 44.98 $\pm$ 1.19                          | 45.52 $\pm$ 1.34                       |
| $D_{\text{max}}$ ( $\text{\AA}$ )                   | 140                                  | 140                                       | 155                                    |
| Porod volume estimate ( $\text{\AA}^3$ )            | 194341                               | 217116                                    | 227480                                 |
| Dry volume ( $\text{\AA}^3$ ) calculated from model | 92990                                | --                                        | --                                     |
| <b>Molecular Mass determination</b>                 |                                      |                                           |                                        |
| Partial specific volume ( $\text{cm}^3/\text{mg}$ ) | 5.4 $\times$ 10 <sup>-4</sup>        | 5.4 $\times$ 10 <sup>-4</sup>             | 5.4 $\times$ 10 <sup>-4</sup>          |
| Molecular Mass $M_r$ [from $I(0)$ , $q=0.3$ ] (kDa) | 77.4 $\pm$ 8.3                       | 103 $\pm$ 5.5                             | 100.7 $\pm$ 7.1                        |
| Calculated monomeric $M_r$ from sequence (kDa)      | 82                                   | 96                                        | 88                                     |
| <b>Software employed</b>                            |                                      |                                           |                                        |
| Primary data reduction                              | In-house package at DND<br>CAT       | In-house package at DND<br>CAT            | In-house package at DND<br>CAT         |
| Data processing                                     | PRIMUS (ATSAS)                       | PRIMUS (ATSAS)                            | PRIMUS (ATSAS)                         |
| <i>Ab initio</i> analysis                           | DAMMIN                               | DAMMIN                                    | DAMMIN                                 |
| Validation and averaging                            | DAMVER                               | DAMVER                                    | DAMVER                                 |
| Rigid body modelling                                | PYMOL                                | PYMOL                                     | PYMOL                                  |
| Computation of model intensities                    | CRY SOL;AquaSAXS                     | CRY SOL;AquaSAXS                          | CRY SOL;AquaSAXS                       |
| 3D graphics representations                         | PYMOL                                | PYMOL                                     | PYMOL                                  |

**Supplementary Table II. Sequence features of Stem III helix from *glyQS* T-box riboswitch in closely related gram positive bacteria.**

| Organism                          | Stem III Sequence         | Length | Stability ( $\Delta G$ ) <sup>#</sup> |
|-----------------------------------|---------------------------|--------|---------------------------------------|
| <i>Bacillus subtilis</i>          | AGGCTGGGATTTTGTTCAGC      | 22     | -9.3 kcal/mole                        |
| <i>Bacillus amyloliquefaciens</i> | AGGCTGAGTGATTCACATCCTCAGC | 25     | -9.6 kcal/mole                        |
| <i>Bacillus atrophaeus</i>        | AGGCTGGGGGTAAATCCCGGC     | 22     | -12.7kcal/mole                        |
| <i>Oceanobacillus iheyensis</i>   | TGGCTCATGTATCTTGAGC       | 19     | -5.2 kcal/mole                        |
| <i>Geobacillus kaustophilus</i>   | TGGGTGCGCGTTGGCGCATC      | 21     | -10.2kcal/mole                        |

<sup>#</sup> Values obtained from Mfold server (4) by using Stem III sequence as an input.

### References.

1. Svergun, D., Barberato, C. and Koch, M.H.J. (1995) CRY SOL - A program to evaluate x-ray solution scattering of biological macromolecules from atomic coordinates. *J. Appl. Crystallogr.*, **28**, 768-773.
2. Poitevin, F., Orland, H., Doniach, S., Koehl, P. and Delarue, M. (2011) AquaSAXS: a web server for computation and fitting of SAXS profiles with non-uniformly hydrated atomic models. *Nucleic Acids Res.*, **39**, W184-189.
3. Zhang, J. and Ferre-D'Amare, A.R. (2013) Co-crystal structure of a T-box riboswitch stem I domain in complex with its cognate tRNA. *Nature*, **500**, 363-366.
4. Zuker, M. (2003) Mfold web server for nucleic acid folding and hybridization prediction. *Nucleic Acids Res.*, **31**, 3406-3415.
